# Supplementary material for: Freeze Drying of Polymer Nanoparticles and Liposomes Exploiting Different Saccharide-Based Approaches
Source: MDPI journal article supplement (doi:10.3390/ma16031212), 2023-01-31
Supplement: s1 [file s1]

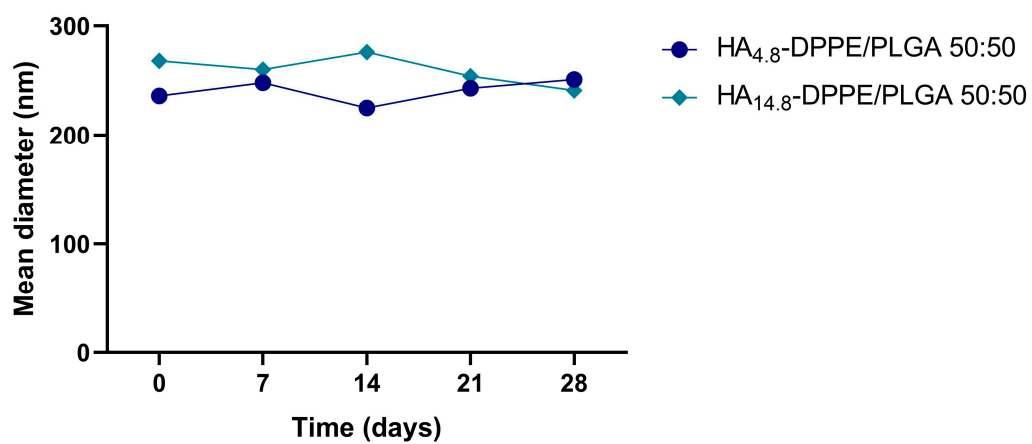

**Figure S1.** Mean hydrodynamic diameter of PLGA 50:50 nanoparticles prepared with HA<sub>4.8</sub>-DPPE or HA<sub>14.8</sub>-DPPE as a function of time ( $n=3$ , S.D.<10% for all samples).
